# Supplementary material
Source: PubMed Central journal article supplement (PMC4060713)
Supplement: 1405514111_pnas.201405514SI.pdf [file 1405514111_pnas.201405514SI.pdf]

# Supporting Information

Tamzalit et al. 10.1073/pnas.1405514111

## SI Materials and Methods

**Cytokines, Abs, and Reagents.** Recombinant human IL-15 (rIL-15) was purchased from Peprotech, and recombinant human IL-2 (rIL-2) was purchased from Chiron. Polyclonal goat anti-human IL-15R $\alpha$  (AF247), PE conjugated donkey anti-goat IgG (F0107), PE and FITC-conjugated mouse anti-human IL-15 (IC2471F and IC2471P), purified mouse IgG1 anti-human IL-15 (MAB247 and MAB647), and isotype control IgG1 were obtained from R&D Systems, and purified anti-human IL-15 (B-E29) was purchased from Diaclone. Alexa-647-conjugated anti-CD4 was obtained from BD Biosciences. Anti-IL-15R $\alpha$  M161 mAb was provided by Amgen. Mouse IgG1 anti-human CD122, Clone A41, (Diaclone) was reported (1).

**Cell Culture.** The human adherent epithelial HeLa cell line and the Human Embryonic Kidney 293 cells (HEK-293) were cultured in DMEM containing 10% of heat-inactivated FCS (Gibco), 2 mM glutamine and 1 mg/mL glucose. The Kit225 human T lymphoma cell line was cultured in RPMI-1640 medium (Sigma-Aldrich), containing 6% heat-inactivated FCS (Gibco), 2 mM glutamine, and 5 ng/mL human rIL-2. NK92 cell line, kindly provided by Henri Vié (Inserm U892, Nantes, France) was cultured in RPMI-1640 medium (Gibco-Invitrogen) containing 10% heat-inactivated human serum, 2 mM glutamine, and 5 ng/mL human rIL-2. Transwell membranes were obtained from BD Falcon. Monocytes were obtained from the DTC Facility (CIC Biotherapy 0503) from Nantes. Cells were cultured in flasks at  $2 \times 10^6$  cells per mL in RPMI 1% glutamin supplemented with 2% human albumin (Laboratoire Français de Fractionnement et de Biotechnologies, Les Ulis, France), 1,000 U/mL recombinant human GM-CSF and 200 U/mL recombinant human IL-4 (CellGenix). Immature DCs were harvested at day 5 and cultured in fresh medium with cytokines in 24-well plates. DC maturation was induced by the addition of 1 mg/mL of LPS (Sigma-Aldrich). All cell lines were maintained at 37 °C, in a humidified, 5% CO<sub>2</sub> atmosphere.

**Molecular Constructs and RT-PCR.** The plasmid corresponding to the full length of IL-15R $\alpha$  was generated by PCR as previously described (2). For mutagenesis, full length IL-15R $\alpha$  sequence was subcloned in pNo plasmid using Xho and Xba sites. Deletions were realized using sequences containing deletion and Quick Change Site-directed Mutagenesis kit (Stratagene) protocol. After amplification, the sequences were ligated at the Xho and Xba sites of the pcDNA3.1/*myc*-His mammalian expression vector (Invitrogen) and sequenced. For the generation of IL-15R $\alpha$  variants, the 5' and 3' sequences framing each part of the deletion on exon 6 were amplified separately and ligated in pcDNA3.1/*myc*-His mammalian expression vector (Invitrogen). For  $\Delta$ I178 deletion, the sense primer 5'-CACCAGTGGCT-TCCACGTCCACTG-3' and the antisense primer 5'-CAGTG-GACGTGGAAGCCACTGTGGTG-3' were used. For  $\Delta$ S179 deletion, the sense primer 5'-CCACTGTGGCTATCAGGTCCAC-TGTC-3' and the antisense primer 5'-GGACAGTGGACGTGA-TAGCCACAGTGG-3' were used. For  $\Delta$ T180 deletion, the sense primer 5'-CTGTGGCTATCTCCTCCACTGTCTGC-3' and the antisense primer 5'-GCAGGACAGTGGAGGAGATAGCCAC-AG-3' were used. For  $\Delta$ S181 deletion, the sense primer 5'-GGCT-ATCTCCACGACTGTCTGCTGTG-3' and the antisense primer 5'-CACAGCAGGACAGTCGTGGAGATAGCC-3' were used. Membrane anchored ILR is a fusion molecule in which a flexible linker was introduced between the C-terminus of IL-15 and the N-terminus of the sushi domain (3). Briefly, a first fragment

composed of BamHI IL-15-Linker 26-Pst was generated by PCR using following primers: sense primer 5'-TTGGATCCGCCGC-CACCATGGACAG-3' and antisense primer 5'-GTAGCTCTT-GTCCCAGATGTC-3'. The second fragment composed of Pst-IL-15R $\alpha$ -stop-Xho was generated by PCR using following primers: sense primer 5'-AACTGCAGATCATATGCCCTCCCCCAT-3' and antisense primer 5'-GACTCTCGAGCTATAGGTGGT-GAGAGCAGTTTTC-3'. After amplification, each fragment was digested with specific enzymes, ligated and inserted between the BamHI and Xho sites of pcDNA3.1/*myc*-His mammalian expression vector (Invitrogen). Soluble sILR by which the human IL-15R $\alpha$  sushi domain (amino acids 1–77) and human IL-15 were separated by a linker 26 was produced as described (3).

Total RNA were isolated using the RNA isolation kit (Macherey-Nagel) according to the manufacturer's instructions. One  $\mu$ g of RNA was subsequently transcribed into cDNA using the Maxima First Strand cDNA Synthesis kit for RT-qPCR (Thermo Scientific). The following PCR was performed using the Thermo Scientific Phusion Hot Start II High-Fidelity DNA Polymerase (Thermo Scientific). Primers used for the PCR are the following: sense primer: 5'-CATTGTTGGGCTGTTTCAGTG-3' and antisense primer: 5'-GGTTTACAAGTAGTTGTGAA-GAACT-3'.

**Transfections and NK92 Cell Isolation.** For transfection,  $1 \times 10^6$  HEK-293 or HeLa cells were cultured overnight and transfected with 10  $\mu$ g of plasmid following a standard PEI Polyplus transfection protocol. After 24 h, the medium was replaced and transfection efficiency verified by flow cytometry. For stable transfections, cells were cultured for 2 wk in 1 mg/mL Geneticin, G418 (Invitrogen) for positive selection and subsequent cloning was done using a FACS Aria III cytometer (Becton Dickinson). For NK92 cells isolation, cells cocultured for 24 h with IL-15 presenting cells, were purified by positive selection with magnetic beads using CD56 microbeads (Miltenyi Biotech) according to the manufacturer's instructions. For alamarBlue proliferation assays,  $2 \times 10^4$  purified NK92 cells were plated in a 96-well plate in 100  $\mu$ L of assay medium [1:9 ratio of alamarBlue (AbD Serotec) to cytokine-deprived medium] for 24 h. Metabolic activity was quantified by measuring the fluorescence at 540/590 nm.

**RIA.** The quantification of sIL-15R $\alpha$  and IL-15:sIL-15R $\alpha$  complex was determined by Sandwich Radio-Immuno-Assay as described (2). Briefly, goat anti-human IL-15R $\alpha$  polyclonal antibody (AF247) was used as capture antibody and radio-iodinated neutralizing monoclonal anti-human IL-15R $\alpha$  antibody M161 or radio-iodinated mouse monoclonal anti-human IL-15 (BE-29) were used as tracer. The M161 and BE-29 monoclonal antibodies were iodinated using the iodination reagent method. AF247 capture antibody was coated at 5  $\mu$ g/mL to high-adsorption wells (breakable strips). Wells were washed and saturated with PBS containing 0.5% of BSA for 15 min at room temperature. A purified recombinant sIL-15R $\alpha$  protein (2) and recombinant IL-15 (Peprotech) were used as standards. Samples and standards were incubated for 1 h at 4 °C. Radio-iodinated M161 or BE-29 antibodies were then added at 500 pM for 1 h at 4 °C. Supernatants of each well were collected and the wells were washed twice with PBS containing 0.5% of BSA. The radioactivity associated with the wells (bound fraction) and contained in the supernatants and washes (unbound fraction) was determined.

For radioactive ELISA detection of intracellular endogenous IL-15:IL-15R $\alpha$  complexes,  $5 \times 10^6$  HEK-293 or purified NK92

cells were washed in PBS and cell pellets were lysed using ice-cold RIPA lysis buffer [20 mM Tris (pH 7.5), 150 mM NaCl, 0.1% deoxycholic acid, 1% Nonidet P-40, 20  $\mu$ M NaVO<sub>4</sub>, 10 mM NaF, 0.4 mM Pefablock, aprotinin and leupeptin at 1  $\mu$ g/mL and protease inhibitors (Roche)]. After incubation on ice for 20 min, samples were centrifuged (15,000  $\times$  g for 15 min at 4 °C) and protein concentration was determined with a BC Assay Kit (Up-tima) using BSA as standard.

**Flow Cytometry.** Cell surface expression of IL-15 and IL-15R $\alpha$  were performed by incubating the cells for 30 min at 4 °C in the dark at optimal concentrations of antibodies. Intracellular detection of IL-15 was performed using BD Cytotfix/Cytoperm Plus Fixation/Permeabilization kit (BD Biosciences) according to manufacturer instructions. For p-Stat5 staining,  $5 \times 10^5$  Kit225 cells were fixed 10 min at 37 °C using Fix Buffer I (BD Biosciences) and permeabilized in Perm Buffer III (BD Biosciences) 30 min at 4 °C. Cells were then labeled with PE-conjugated mouse anti-human phospho-Stat5 (Y694) or PE-conjugated control isotype (BD Biosciences) for 1 h at room temperature. Annexin V staining was performed according to the protocol of the manufacturer (BD Biosciences). Cells were analyzed with a Calibur cytometer (Becton Dickinson) and FlowJo software.

**Immunofluorescence Microscopy and Analysis.** A total of  $1.5 \times 10^5$  wt. ILR or uc.ILR HEK-293 stably transfected cells were seeded

overnight on glass coverslips pretreated with poly-D-lysine (Sigma Aldrich). Kit225 cells were starved overnight in a cytokine-deprived medium. For IL-15 *trans*-presentation experiments,  $7.5 \times 10^4$  Kit225 cells were added to each type of HEK-293 for 1 h at 37 °C. Subsequently, cells were stained with Alexa-647-conjugated anti-CD4 antibody, fixed with 1% paraformaldehyde for 15 min at room temperature and permeabilized with PBS containing 0.05% Triton  $\times$ 100 (Sigma Aldrich) for 10 min at room temperature. Coverslips were then blocked with PBS for 30 min at 4 °C and incubated with FITC-conjugated anti-IL-15 antibody or FITC-conjugated mouse IgG1 isotype control for 30 min at room temperature. The slides were mounted by using Prolong Gold Antifade reagent with DAPI (Life Technologies) and images were recorded using a Nikon A1 RS confocal microscope (60 $\times$  NA 1.40 oil). Images processing and orthogonal view representations were done with FIJI software. Three-dimensional visualizations were done with Amira 5.5.0 software (FEI).

**Statistical Analysis.** Unpaired *t* tests were used for comparisons between two normally distributed groups. Differences were considered significant at  $P < 0.05$ . All statistical analyses were performed by using Prism 4 (GraphPad). Significance levels of statistical tests are: not significant (ns); \* $P < 0.05$ ; \*\* $P < 0.01$ ; or \*\*\* $P < 0.001$ .

1. Kaluza B, Betzl G, Shao H, Diamantstein T, Weidle UH (1992) A general method for chimerization of monoclonal antibodies by inverse polymerase chain reaction which conserves authentic N-terminal sequences. *Gene* 122(2):321–328.
2. Mortier E, Bernard J, Plet A, Jacques Y (2004) Natural, proteolytic release of a soluble form of human IL-15 receptor alpha-chain that behaves as a specific, high affinity IL-15 antagonist. *J Immunol* 173(3):1681–1688.

3. Mortier E, et al. (2006) Soluble interleukin-15 receptor alpha (IL-15R alpha)-sushi as a selective and potent agonist of IL-15 action through IL-15R beta/gamma. Hyperagonist IL-15  $\times$  IL-15R alpha fusion proteins. *J Biol Chem* 281(3):1612–1619.



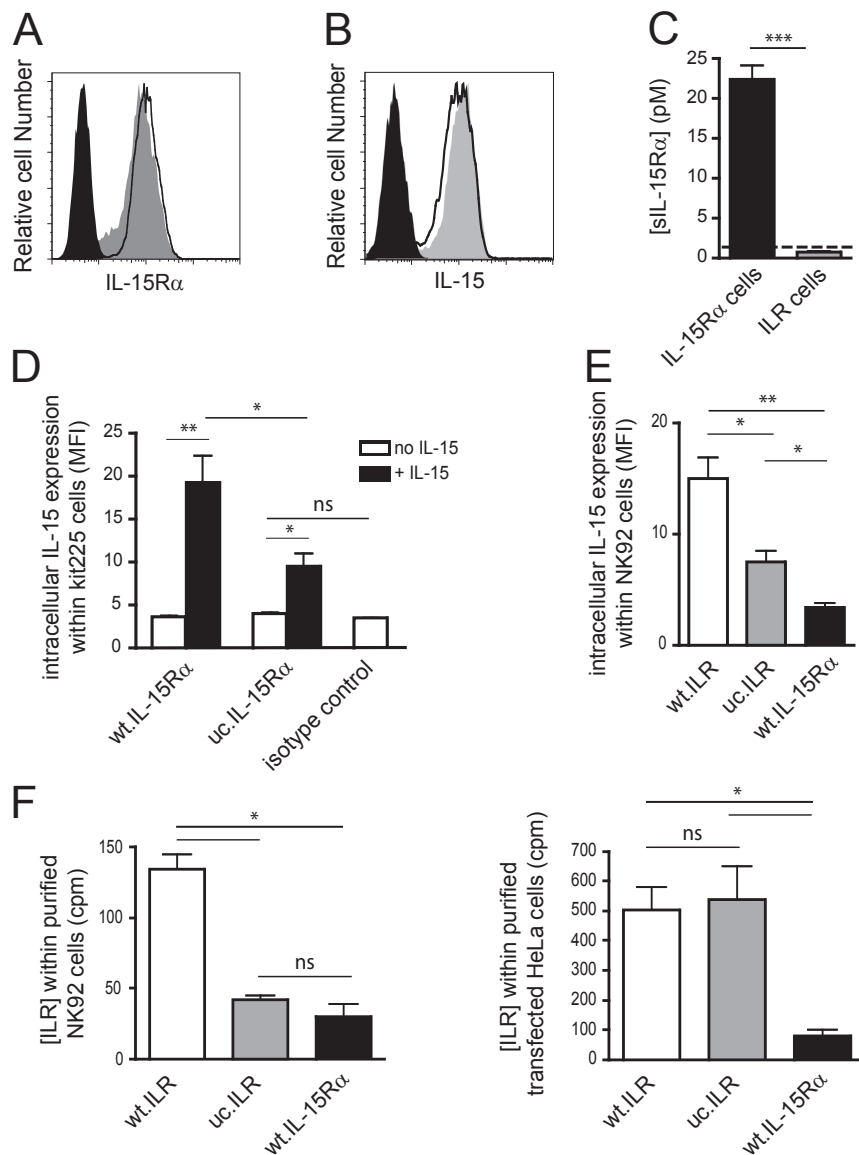

**Fig. S2.** (A) Flow cytometric analysis of IL-15R $\alpha$  expression at the surface of wt.IL-15R $\alpha$  (black histogram) and uc.IL-15R $\alpha$  stably transfected HEK-293 cells (gray filled histogram). Isotype control staining is shown as black filled histogram. (B) Flow cytometric analysis of expression of IL-15 at the surface of wt.ILR (black histogram), uc.ILR cells (gray filled histogram), and wt.IL-15R $\alpha$  transfected HEK-293 cells (black filled histogram). (C) ELISA detection of sIL-15R $\alpha$  released in the culture supernatant from wt.IL-15R $\alpha$  and wt.ILR transfected HEK-293 cells after 24 h of culture. Dashed line indicates the ELISA detection threshold (1 pM). (D) Flow cytometric analysis of IL-15 expression within Kit225 responding cells cocultured for 24 h with wt.IL-15R $\alpha$  or uc.IL-15R $\alpha$  HeLa cells, previously loaded overnight with 500 pM IL-15 or not. (E) Flow cytometric analysis of intracellular IL-15 expression (MFI) within NK92 responding cells following 24 h coculture with annotated cells. (F Left) ELISA measurement of IL-15:IL-15R $\alpha$  complexes in lysates from purified NK92 cells (Left) previously cocultured for 24 h with wt.ILR, uc.ILR, or wt.IL-15R $\alpha$  HeLa transfected cells. (F Right) ELISA measurement of IL-15:IL-15R $\alpha$  complexes in lysates from wt.ILR, uc.ILR, or wt.IL-15R $\alpha$  HeLa cells. Results are shown in cpm. All data are representative of at least two separate experiments. ns, not significant; \* $P$  < 0.05; \*\* $P$  < 0.01; \*\*\* $P$  < 0.001.
